# Supplementary material
Source: PubMed Central journal article supplement (PMC9689753)
Supplement: NIHMS1848584-supplement-Suppl_Material.pdf [file NIHMS1848584-supplement-Suppl_Material.pdf]

**Online Appendix for the following *JACC* article**

**TITLE:** *SCN5A* Mutations Associate With Arrhythmic Dilated Cardiomyopathy and Commonly Localize to the Voltage-Sensing Mechanism

**AUTHORS:** William P. McNair, PhD, Gianfranco Sinagra, MD, Matthew R. G. Taylor, MD, PhD, Andrea Di Lenarda, MD, Debra A. Ferguson, MS, ANP, Ernesto E. Salcedo, MD, Dobromir Slavov, PhD, Xiao Zhu, BS, John Caldwell, PhD, Luisa Mestroni, MD, and the Familial Cardiomyopathy Registry Research Group

---

**APPENDIX**

**Table 1. Conservation Analysis of Residues T220, R222 of Domain I, S4, and R814 of Domain II, S4\***

| Protein      | NCBI Identifier | Location             |            | S4 Sequence |          |          |          |          |          |          |          |          |          |          |          |          |          |          |          |          |          |          |          |          |   |   |   |
|--------------|-----------------|----------------------|------------|-------------|----------|----------|----------|----------|----------|----------|----------|----------|----------|----------|----------|----------|----------|----------|----------|----------|----------|----------|----------|----------|---|---|---|
| KHACN4       | Q9Y3Q4          | S4                   | 369        |             | T        | K        | I        | L        | S        | L        | L        | R        | L        | L        | R        | L        | S        | R        | L        | I        | R        | Y        | I        | H        |   |   |   |
| BCNG1        | O60741          | S4                   | 249        |             | T        | K        | I        | L        | S        | L        | L        | R        | L        | L        | R        | L        | S        | R        | L        | I        | R        | Y        | I        | H        |   |   |   |
| BCNG2        | Q9UL51          | S4                   | 318        |             | T        | K        | I        | L        | S        | L        | L        | R        | L        | L        | R        | L        | S        | R        | L        | I        | R        | Y        | I        | H        | Q |   |   |
| Kv11.1       | Q12809          | S4                   | 521        |             | L        | L        | K        | T        | A        | R        | L        | L        | R        | L        | V        | R        | V        | A        | R        | K        | L        | D        | R        | Y        |   |   |   |
| Kv11.2       | Q9H252          | S4                   | 371        |             | L        | L        | K        | T        | A        | R        | L        | L        | R        | L        | V        | R        | V        | A        | R        | K        | L        | D        | R        | Y        |   |   |   |
| KvH2C        | NP_742054       | S4                   | 181        |             | L        | L        | K        | T        | A        | R        | L        | L        | R        | L        | V        | R        | V        | A        | R        | K        | L        | D        | R        | Y        |   |   |   |
| Kv10.1       | O95259          | S4                   | 350        |             | S        | L        | K        | V        | V        | R        | L        | L        | R        | L        | G        | R        | V        | A        | R        | K        | L        | D        | H        | Y        |   |   |   |
| Kv10.2       | Q8NCM5          | S4                   | 320        |             | S        | L        | K        | V        | V        | R        | L        | L        | R        | L        | G        | R        | V        | A        | R        | K        | L        | D        | H        | Y        | L |   |   |
| SCN11A       | Q9UI33          | Domain IV, S4        | 1462       |             | F        | R        | I        | V        | R        | L        | A        | R        | I        | G        | R        | I        | L        | R        | L        | V        | R        | A        | A        | R        |   |   |   |
| SCN10A       | Q9Y5Y9          | Domain IV, S4        | 1573       |             | F        | R        | V        | I        | R        | L        | A        | R        | I        | G        | R        | I        | L        | R        | L        | I        | R        | A        | A        | K        |   |   |   |
| SCN4A        | P35499          | Domain IV, S4        | 1447       |             | F        | R        | V        | I        | R        | L        | A        | R        | I        | G        | R        | V        | L        | R        | L        | I        | R        | G        | A        | K        |   |   |   |
| SCN5A        | Q14524          | Domain IV, S4        | 1622       |             | F        | R        | V        | I        | R        | L        | A        | R        | I        | G        | R        | I        | L        | R        | L        | I        | R        | G        | A        | K        |   |   |   |
| SCN1A        | P35498          | Domain IV, S4        | 1636       |             | F        | R        | V        | I        | R        | L        | A        | R        | I        | G        | R        | I        | L        | R        | L        | I        | K        | G        | A        | K        |   |   |   |
| SCN2A        | Q99250          | Domain IV, S4        | 1626       |             | F        | R        | V        | I        | R        | L        | A        | R        | I        | G        | R        | I        | L        | R        | L        | I        | K        | G        | A        | K        |   |   |   |
| SCN3A        | Q9NY46          | Domain IV, S4        | 1621       |             | F        | R        | V        | I        | R        | L        | A        | R        | I        | G        | R        | I        | L        | R        | L        | I        | K        | G        | A        | K        |   |   |   |
| SCN8A        | Q9UQD0          | Domain IV, S4        | 1617       |             | F        | R        | V        | I        | R        | L        | A        | R        | I        | G        | R        | I        | L        | R        | L        | I        | K        | G        | A        | K        |   |   |   |
| SCN9A        | Q15858          | Domain IV, S4        | 1610       |             | F        | R        | V        | I        | R        | L        | A        | R        | I        | G        | R        | I        | L        | R        | L        | V        | K        | G        | A        | K        |   |   |   |
| CACNA1G      | O43497          | Domain III, S4       | 1379       |             | L        | R        | V        | L        | R        | L        | L        | R        | T        | L        | R        | P        | L        | R        | V        | I        | S        | R        | A        | Q        |   |   |   |
| CACNA1I      | Q9P0X4          | Domain III, S4       | 1271       |             | L        | R        | V        | L        | R        | L        | R        | T        | L        | R        | P        | L        | R        | V        | I        | S        | R        | A        | P        |          |   |   |   |
| CACNA1S      | Q13698          | Domain III, S4       | 893        |             | V        | K        | I        | L        | R        | V        | L        | R        | V        | L        | R        | P        | L        | R        | A        | I        | N        | R        | A        | K        |   |   |   |
| CACNA1C      | Q13936          | Domain III, S4       | 1014       |             | V        | K        | I        | L        | R        | V        | L        | R        | V        | L        | R        | P        | L        | R        | A        | I        | N        | R        | A        | K        |   |   |   |
| CACNA1G      | O43497          | Domain I, S4         | 176        |             | F        | S        | A        | V        | R        | T        | V        | R        | V        | L        | R        | P        | L        | R        | A        | I        | N        | R        | V        | P        |   |   |   |
| CACNA1S      | Q13698          | Domain I, S4         | 161        |             | V        | K        | A        | L        | R        | A        | F        | R        | V        | L        | R        | P        | L        | R        | L        | V        | S        | G        | V        | P        |   |   |   |
| CACNA1C      | Q13936          | Domain I, S4         | 233        |             | V        | K        | A        | L        | R        | A        | F        | R        | V        | L        | R        | P        | L        | R        | L        | V        | S        | G        | V        | P        |   |   |   |
| CACNA1I      | Q9P0X4          | Domain I, S4         | 174        |             | L        | S        | A        | I        | R        | T        | V        | R        | V        | L        | R        | P        | L        | K        | A        | I        | N        | R        | V        | P        |   |   |   |
| CACNA1A      | O00555          | Domain I, S4         | 191        |             | L        | R        | T        | L        | R        | A        | V        | R        | V        | L        | R        | P        | L        | K        | L        | V        | S        | G        | I        | P        |   |   |   |
| CACNA1E      | NP_000712       | Domain I, S4         | 186        |             | L        | R        | T        | L        | R        | A        | V        | R        | V        | L        | R        | P        | L        | K        | L        | V        | S        | G        | I        | P        |   |   |   |
| SCN1A        | P35498          | Domain III, S4       | 1315       |             |          |          |          | L        | R        | T        | L        | R        | A        | L        | R        | P        | L        | R        | A        | L        | S        | R        | F        | E        | G | M | R |
| SCN5A        | Q14524          | Domain III, S4       | 1296       |             |          |          |          | L        | R        | T        | L        | R        | A        | L        | R        | P        | L        | R        | A        | L        | S        | R        | F        | E        | G | M | R |
| SCN2A        | Q99250          | Domain III, S4       | 1299       |             |          |          |          | L        | R        | T        | L        | R        | A        | L        | R        | P        | L        | R        | A        | L        | S        | R        | F        | E        | G | M | R |
| SCN3A        | Q9NY46          | Domain III, S4       | 1303       |             |          |          |          | L        | R        | T        | L        | R        | A        | L        | R        | P        | L        | R        | A        | L        | S        | R        | F        | E        | G | M | R |
| SCN4A        | P35499          | Domain III, S4       | 1122       |             |          |          |          | L        | R        | T        | L        | R        | A        | L        | R        | P        | L        | R        | A        | L        | S        | R        | F        | E        | G | M | R |
| SCN8A        | Q9UQD0          | Domain III, S4       | 1295       |             |          |          |          | L        | R        | T        | L        | R        | A        | L        | R        | P        | L        | R        | A        | L        | S        | R        | F        | E        | G | M | R |
| SCN9A        | Q15858          | Domain III, S4       | 1289       |             |          |          |          | L        | R        | T        | L        | R        | A        | L        | R        | P        | L        | R        | A        | L        | S        | R        | F        | E        | G | M | R |
| SCN10A       | Q9Y5Y9          | Domain III, S4       | 1243       |             |          |          |          | L        | R        | T        | L        | R        | A        | L        | R        | P        | L        | R        | A        | L        | S        | R        | F        | E        | G | M | R |
| SCN11A       | Q9UI33          | Domain III, S4       | 1140       |             |          |          |          | F        | R        | T        | L        | R        | A        | L        | R        | P        | L        | R        | A        | L        | S        | Q        | F        | E        | G | M | K |
| CACNA1A      | O00555          | Domain III, S4       | 1342       |             | I        | K        | S        | L        | R        | V        | L        | R        | V        | L        | R        | P        | L        | K        | T        | I        | K        | R        | L        | P        |   |   |   |
| CACNA1E      | NP_000712       | Domain III, S4       | 1254       |             | I        | K        | S        | L        | R        | V        | L        | R        | V        | L        | R        | P        | L        | K        | T        | I        | K        | R        | L        | P        |   |   |   |
| SCN7A        | Q01118          | Domain I, S4         | 204        |             | T        | L        | Q        | T        | A        | R        | T        | L        | R        | I        | L        | K        | I        | I        | P        | L        | N        | Q        | G        | L        |   |   |   |
| SCN1A        | P35498          | Domain I, S4         | 214        |             | A        | L        | R        | T        | F        | R        | V        | L        | R        | A        | L        | K        | T        | I        | S        | V        | I        | P        | G        | L        |   |   |   |
| SCN2A        | Q99250          | Domain I, S4         | 215        |             | A        | L        | R        | T        | F        | R        | V        | L        | R        | A        | L        | K        | T        | I        | S        | V        | I        | P        | G        | L        |   |   |   |
| SCN3A        | Q9NY46          | Domain I, S4         | 214        |             | A        | L        | R        | T        | F        | R        | V        | L        | R        | A        | L        | K        | T        | I        | S        | V        | I        | P        | G        | L        |   |   |   |
| SCN4A        | P35499          | Domain I, S4         | 217        |             | A        | L        | R        | T        | F        | R        | V        | L        | R        | A        | L        | K        | T        | I        | T        | V        | I        | P        | G        | L        |   |   |   |
| <b>SCN5A</b> | <b>Q14524</b>   | <b>Domain I, S4</b>  | <b>217</b> |             | <b>A</b> | <b>L</b> | <b>R</b> | <b>T</b> | <b>F</b> | <b>R</b> | <b>V</b> | <b>L</b> | <b>R</b> | <b>A</b> | <b>L</b> | <b>K</b> | <b>T</b> | <b>I</b> | <b>S</b> | <b>V</b> | <b>I</b> | <b>S</b> | <b>G</b> | <b>L</b> |   |   |   |
| SCN8A        | Q9UQD0          | Domain I, S4         | 218        |             | A        | L        | R        | T        | F        | R        | V        | L        | R        | A        | L        | K        | T        | I        | S        | V        | I        | P        | G        | L        |   |   |   |
| SCN9A        | Q15858          | Domain I, S4         | 212        |             | A        | L        | R        | T        | F        | R        | V        | L        | R        | A        | L        | K        | T        | I        | S        | V        | I        | P        | G        | L        |   |   |   |
| SCN10A       | Q9Y5Y9          | Domain I, S4         | 213        |             | G        | L        | R        | T        | F        | R        | V        | L        | R        | A        | L        | K        | T        | V        | S        | V        | I        | P        | G        | L        |   |   |   |
| SCN11A       | Q9UI33          | Domain I, S4         | 220        |             | P        | L        | R        | T        | F        | R        | V        | F        | R        | A        | L        | K        | A        | I        | S        | V        | V        | S        | R        | L        |   |   |   |
| SCN11A       | Q9UI33          | Domain II, S4        | 668        |             | F        | L        | R        | S        | F        | R        | V        | L        | R        | V        | F        | K        | L        | A        | K        | S        | W        | P        | T        | L        |   |   |   |
| <b>SCN5A</b> | <b>Q14524</b>   | <b>Domain II, S4</b> | <b>806</b> |             | <b>V</b> | <b>L</b> | <b>R</b> | <b>S</b> | <b>F</b> | <b>R</b> | <b>L</b> | <b>L</b> | <b>R</b> | <b>V</b> | <b>F</b> | <b>K</b> | <b>L</b> | <b>A</b> | <b>K</b> | <b>S</b> | <b>W</b> | <b>P</b> | <b>T</b> | <b>L</b> |   |   |   |
| SCN1A        | P35498          | Domain II, S4        | 857        |             | V        | L        | R        | S        | F        | R        | L        | L        | R        | V        | F        | K        | L        | A        | K        | S        | W        | P        | T        | L        |   |   |   |
| SCN2A        | Q99250          | Domain II, S4        | 848        |             | V        | L        | R        | S        | F        | R        | L        | L        | R        | V        | F        | K        | L        | A        | K        | S        | W        | P        | T        | L        |   |   |   |
| SCN3A        | Q9NY46          | Domain II, S4        | 849        |             | V        | L        | R        | S        | F        | R        | L        | L        | R        | V        | F        | K        | L        | A        | K        | S        | W        | P        | T        | L        |   |   |   |
| SCN4A        | P35499          | Domain II, S4        | 667        |             | V        | L        | R        | S        | F        | R        | L        | L        | R        | V        | F        | K        | L        | A        | K        | S        | W        | P        | T        | L        |   |   |   |
| SCN7A        | Q01118          | Domain II, S4        | 593        |             | L        | L        | R        | L        | F        | R        | M        | L        | R        | I        | F        | K        | L        | G        | K        | Y        | W        | P        | T        | F        |   |   |   |
| SCN8A        | Q9UQD0          | Domain II, S4        | 842        |             | V        | L        | R        | S        | F        | R        | L        | L        | R        | V        | F        | K        | L        | A        | K        | S        | W        | P        | T        | L        |   |   |   |
| SCN9A        | Q15858          | Domain II, S4        | 833        |             | V        | L        | R        | S        | F        | R        | L        | L        | R        | V        | F        | K        | L        | A        | K        | S        | W        | P        | T        | L        |   |   |   |
| SCN10A       | Q9Y5Y9          | Domain II, S4        | 754        |             | V        | L        | R        | S        | F        | R        | L        | L        | R        | V        | F        | K        | L        | A        | K        | S        | W        | P        | T        | L        |   |   |   |

Table 1, continued

| Protein   | NCBI Identifier | Location      |      | S4 Sequence |   |   |   |   |   |   |   |   |   |   |   |   |   |   |   |   |   |   |   |   |   |   |   |   |   |
|-----------|-----------------|---------------|------|-------------|---|---|---|---|---|---|---|---|---|---|---|---|---|---|---|---|---|---|---|---|---|---|---|---|---|
| CACNA1A   | O00555          | Domain II, S4 | 579  |             |   | I | S | V | L | R | A | L | R | L | L | R | I | F | K | V | T | K | Y | W | A |   |   |   |   |
| CACNA1E   | NP_000712       | Domain II, S4 | 568  |             |   | I | S | V | L | R | A | L | R | L | L | R | I | F | K | I | T | K | Y | W | A |   |   |   |   |
| CACNA1S   | Q13698          | Domain II, S4 | 524  |             |   | I | S | V | L | R | C | I | R | L | L | R | I | F | K | I | T | K | Y | W | T |   |   |   |   |
| CACNA1C   | Q13936          | Domain II, S4 | 616  |             |   | I | S | V | L | R | C | V | R | L | L | R | I | F | K | I | T | R | Y | W | N |   |   |   |   |
| Kv1.2     | NP_000710.4     | S4            | 293  |             |   | L | R | V | I | R | L | V | R | V | F | R | I | F | K | L | S | R | H | S |   |   |   |   |   |
| Kv1.1     | NP_000208       | S4            | 291  |             |   | L | R | V | I | R | L | V | R | V | F | R | I | F | K | L | S | R | H | S |   |   |   |   |   |
| Kv1.3     | NP_002223       | S4            | 311  |             |   | L | R | V | I | R | L | V | R | V | F | R | I | F | K | L | S | R | H | S |   |   |   |   |   |
| Kv1.5     | NP_002225       | S4            | 398  |             |   | L | R | V | I | R | L | V | R | V | F | R | I | F | K | L | S | R | H | S |   |   |   |   |   |
| Kv1.6     | NP_002226       | S4            | 340  |             |   | L | R | V | I | R | L | V | R | V | F | R | I | F | K | L | S | R | H | S |   |   |   |   |   |
| Kv1.7     | NP_114092       | S4            | 276  |             | I | L | R | V | I | R | L | V | R | V | F | R | I | F | K | L | S | R | H | S |   |   |   |   |   |
| Kv1.10    | NP_005540       | S4            | 334  | I           |   | L | R | I | I | R | L | V | R | V | F | R | I | F | K | L | S | R | H | S |   |   |   |   |   |
| Kv1.4     | P15385          | S4            | 445  |             |   | L | R | I | I | R | L | V | R | V | F | R | I | F | K | L | S | R | H | S |   |   |   |   |   |
| Kv1.4     | NP_002224       | S4            | 443  |             |   | L | R | I | I | R | L | V | R | V | F | R | I | F | K | L | S | R | H | S |   |   |   |   |   |
| KvSHAL3-2 | NP_751948       | S4            | 286  |             |   | F | V | T | L | R | V | F | R | V | F | R | I | F | K | F | S | R | H | S |   |   |   |   |   |
| KvSHAL3-1 | NP_004971       | S4            | 286  |             |   | F | V | T | L | R | V | F | R | V | F | R | I | F | K | F | S | R | H | S |   |   |   |   |   |
| KvSHAL2   | NP_036413       | S4            | 293  |             |   | F | V | T | L | R | V | F | R | V | F | R | I | F | K | F | S | R | H | S |   |   |   |   |   |
| KvSHAL1   | AAH45659        | S4            | 289  |             |   | S | G | A | F | V | T | L | R | V | F | R | I | F | K | F | S | R | H | S |   |   |   |   |   |
| Kv3.4     | Q03721          | S4            | 345  |             |   | L | R | V | V | R | F | V | R | I | L | R | I | F | K | L | T | R | H | F |   |   |   |   |   |
| KvDRect   | NP_002243       | S4            | 291  |             |   | I | L | R | L | M | R | I | F | R | I | L | K | L | A | R | H | S |   |   |   |   |   |   |   |
| KvG3-1    | AAH71558        | S4            | 288  |             |   | L | R | V | L | R | M | M | R | I | F | W | V | I | K | L | A | R | H | F |   |   |   |   |   |
| CACNA1I   | Q9P0X4          | Domain II, S4 | 727  |             |   | L | S | V | L | R | T | F | R | L | R | V | L | K | L | V | R | F | M | P |   |   |   |   |   |
| CACNA1G   | O43497          | Domain II, S4 | 833  |             |   | L | S | V | L | R | T | F | R | L | M | R | V | L | K | L | V | R | F | L | P |   |   |   |   |
| CACNA1C   | Q13936          | Domain IV, S4 | 1373 |             |   | I | T | F | F | R | L | F | R | V | M | R | L | V | K | L | L | S | R | G | E |   |   |   |   |
| CACNA1G   | O43497          | Domain IV, S4 | 1708 |             |   | I | R | I | M | R | V | L | R | I | A | R | V | L | K | L | L | K | M | A | V |   |   |   |   |
| CACNA1I   | Q9P0X4          | Domain IV, S4 | 1584 |             |   | I | R | I | M | R | V | L | R | I | A | R | V | L | K | L | L | K | M | A | T |   |   |   |   |
| CACNA1A   | O00555          | Domain IV, S4 | 1657 |             |   | L | S | F | L | R | L | F | R | A | A | R | L | I | K | L | L | R | Q | G | Y |   |   |   |   |
| CACNA1E   | NP_000712       | Domain IV, S4 | 1572 |             |   | M | S | F | L | K | L | F | R | A | A | R | L | I | K | L | L | R | Q | G | Y |   |   |   |   |
| KvSHAL1   | AAH46629        | S4            | 342  |             | V | L | R | V | L | R | A | L | R | I | L | Y | V | M | R | L | A | R | H | S |   |   |   |   |   |
| Kv7.1     | P51787          | S4            | 228  |             |   | R | G | I | R | F | L | Q | I | L | R | M | L | H | V | D | R | Q | G | G | T | W | K | L | V |
| Kv7.2     | O88943          | S4            | 198  |             |   | R | S | L | R | F | L | Q | I | L | R | M | I | R | M | D | R | R | G | G | T | W | K | L | V |
| Kv7.4     | P56696          | S4            | 202  |             |   | R | S | M | R | F | L | Q | I | L | R | M | V | R | M | D | R | R | G | G | T | W | F | G | I |
| TRPM1     | NP_002411       | S4            | 848  |             |   | G | R | V | I | Y | C | V | D | I | I | F | W | Y | I | R | V | L | D | I | F | T | V |   |   |
| TRPM2     | O94759          | S4            | 897  |             |   | G | R | V | I | L | S | L | D | F | I | L | F | C | L | R | L | M | H | I | F | G | V |   |   |
| TRPM3     | NP_002411       | S4            | 996  |             |   | G | R | V | I | Y | C | V | N | I | I | Y | W | Y | I | R | L | L | D | I | F | T | I |   |   |
| TRPM4     | NP_060106       | S4            | 893  |             |   | G | R | T | V | L | C | I | D | F | M | V | F | T | V | R | L | L | H | I | F | A | V |   |   |
| TRPM5     | NP_055370       | S4            | 833  |             |   | G | R | T | V | L | A | M | D | F | M | V | F | T | V | R | L | L | H | I | F | A | V |   |   |
| TRPM6     | Q9BX84          | S4            | 940  |             |   | G | R | L | I | Y | C | I | D | I | I | F | W | F | S | R | L | L | D | F | L | A | V |   |   |
| TRPM7     | Q96QT4          | S4            | 963  |             |   | G | R | L | I | Y | C | L | N | I | I | F | W | Y | V | R | L | L | D | F | F | T |   |   |   |
| TRPM8     | Q7Z2W7          | S4            | 830  |             |   | G | R | V | I | F | C | L | D | Y | I | I | F | T | L | R | L | I | H | I |   |   |   |   |   |

\*BLAST alignments of S4 transmembrane segments among homologous proteins

demonstrate sequence conservation of positions T220, R222, and R814 in *SCN5A*.

Relevant residues and segments of human *SCN5A* are in bold typeface and bracketed for easier identification. Colors were randomly selected and assigned to different amino acids to facilitate alignment.

**Table 2. Conservation Analysis of SCN5A Residues E446 and F1520\***

| Species           | Protein | NCBI Identifie | E446 Conservation             |   |   |   |   |   |          |   | F1520 Conservation               |   |   |   |                                  |   |          |   |   |   |          |   |   |   |   |   |
|-------------------|---------|----------------|-------------------------------|---|---|---|---|---|----------|---|----------------------------------|---|---|---|----------------------------------|---|----------|---|---|---|----------|---|---|---|---|---|
| Human             | SCN5A   | Q14524         | 441                           | L | K | K | E | H | <b>E</b> | A | L                                | T | I | R | 1515                             | N | K        | Y | Q | G | <b>F</b> | I | F | D | I | V |
| Mus Musculus      | SCN5A   | 84875498       | 441                           | L | K | K | E | H | <b>E</b> | A | L                                | T | I | R | 1518                             | N | K        | Y | Q | G | <b>F</b> | I | F | D | I | V |
| Canis Lupus       | SCN5A   | 50950233       | 441                           | L | K | K | E | H | <b>E</b> | A | L                                | T | I | R | 1512                             | N | K        | Y | Q | G | <b>F</b> | L | F | D | I | V |
| Bos Taurus        | SCN5A   | 27806135       | 444                           | L | K | K | E | Q | <b>E</b> | A | L                                | A | I | R | 1520                             | N | K        | Y | Q | G | <b>F</b> | I | F | D | I | V |
| Gallus Gallus     | SCN5A   | 118085545      | 439                           | L | K | K | E | Q | <b>E</b> | A | L                                | A | A | K | 1539                             | N | K        | Y | Q | G | <b>F</b> | I | F | D | V | V |
| Pan Troglodytes   | SCN5A   | 114586083      | 441                           | L | K | K | E | H | <b>E</b> | A | L                                | T | I | R | 1515                             | N | K        | Y | Q | G | <b>F</b> | I | F | D | I | V |
| Canis familiaris  | SCN5A   | 29691680       | 442                           | L | K | K | E | H | <b>E</b> | A | L                                | T | I | R | 1512                             | N | K        | Y | Q | G | <b>F</b> | L | F | D | I | V |
| Rattus norvegicus | SCN5A   | P15389.1       | 441                           | L | K | K | E | H | <b>E</b> | A | L                                | T | I | R | 1517                             | N | K        | Y | Q | G | <b>F</b> | I | F | D | I | V |
| Human             | SCN1A   | P35498         | 451                           | L | K | K | Q | Q | <b>E</b> | A | A                                | Q | Q | A | 1528                             | N | K        | F | Q | G | <b>M</b> | V | F | D | F | V |
| Human             | SCN2A   | Q99250         | 452                           | L | K | K | Q | Q | <b>E</b> | E | A                                | Q | A | A | 1518                             | N | K        | F | Q | G | <b>M</b> | V | F | D | F | V |
| Human             | SCN3A   | Q9NY46         | 451                           | L | K | K | Q | Q | <b>E</b> | E | A                                | Q | A | V | 1513                             | N | K        | F | Q | G | <b>M</b> | V | F | D | F | V |
| Human             | SCN4A   | P35499         | 472                           | F | K | K | H | Q | <b>E</b> | E | L                                | E | K | A | 1340                             | N | K        | I | Q | G | <b>M</b> | V | Y | D | L | V |
| Human             | SCN7A   | Q01118         | 422                           | L | Q | E | G | N | <b>E</b> | T | D                                | E | A | K | 1238                             | N | K        | L | Q | G | <b>F</b> | I | F | D | V | V |
| Human             | SCN8A   | Q9UQD0         | 439                           | L | K | K | Q | Q | <b>E</b> | E | A                                | Q | A | A | 1509                             | N | K        | I | Q | G | <b>I</b> | V | F | D | F | V |
| Human             | SCN9A   | Q15858         | 430                           | L | K | K | E | Q | <b>E</b> | E | A                                | E | A | I | 1502                             | N | K        | I | Q | G | <b>C</b> | I | F | D | L | V |
| Human             | SCN10A  | Q9Y5Y9         | 426                           | L | R | K | E | Q | <b>E</b> | V | L                                | A | A | L | 1463                             | N | K        | F | Q | G | <b>F</b> | V | F | D | I | V |
| Human             | SCN11A  | Q9UI33         | 428                           | L | K | E | E | K | <b>E</b> | A | L                                | V | A | M | 1353                             | N | K        | C | Q | G | <b>L</b> | V | F | D | I | V |
| Human             | CAC1A   | O00555         | 396                           | I | S | K | A | E | <b>E</b> | V | I                                | L | A | E | Poor Alignment / No Conservation |   |          |   |   |   |          |   |   |   |   |   |
| Human             | CAC1B   | Q00975         | 392                           | I | F | K | A | E | <b>E</b> | V | M                                | L | A | E | Poor Alignment / No Conservation |   |          |   |   |   |          |   |   |   |   |   |
| Human             | CAC1C   | Q13936         | No alignment at this position |   |   |   |   |   |          |   | Poor Alignment / No Conservation |   |   |   |                                  |   |          |   |   |   |          |   |   |   |   |   |
| Human             | CAC1D   | Q01668         | No alignment at this position |   |   |   |   |   |          |   | Poor Alignment / No Conservation |   |   |   |                                  |   |          |   |   |   |          |   |   |   |   |   |
| Human             | CAC1E   | Q15878         | No alignment at this position |   |   |   |   |   |          |   | Poor Alignment / No Conservation |   |   |   |                                  |   |          |   |   |   |          |   |   |   |   |   |
| Human             | CAC1F   | O60840         | No alignment at this position |   |   |   |   |   |          |   | Poor Alignment / No Conservation |   |   |   |                                  |   |          |   |   |   |          |   |   |   |   |   |
| Human             | CAC1G   | O43497.3       | No alignment at this position |   |   |   |   |   |          |   | Poor Alignment / No Conservation |   |   |   |                                  |   |          |   |   |   |          |   |   |   |   |   |
| Human             | CAC1H   | O95180         | No alignment at this position |   |   |   |   |   |          |   | Poor Alignment / No Conservation |   |   |   |                                  |   |          |   |   |   |          |   |   |   |   |   |
| Human             | CAC1I   | Q9P0X4.1       | No alignment at this position |   |   |   |   |   |          |   | Poor Alignment / No Conservation |   |   |   |                                  |   |          |   |   |   |          |   |   |   |   |   |
| Human             | CAC1S   | Q13698         | No alignment at this position |   |   |   |   |   |          |   | 405                              | N | K | I | I                                | Q | <b>F</b> | I | R | H | W        | R |   |   |   |   |

\*BLAST alignments of sequence immediately adjoining novel mutation sites E446 and F1520 in *SCN5A* demonstrate conservation among homologous, orthologous, and paralogous proteins. Pertinent positions within alignments are in boldface and bracketed for easier comparison.

**Table 3. Conservation Analysis of Residues D1275 and V1279 of Domain III, S3, and D1595 of Domain IV, S3\***

| Protein   | NCBI Identifier | Location       |      | S3 Segment |   |   |   |   |   |   |   |   |   |   |   |   |   |   |   |   |   |   |   |
|-----------|-----------------|----------------|------|------------|---|---|---|---|---|---|---|---|---|---|---|---|---|---|---|---|---|---|---|
| CACNA1S   | Q13698          | Domain II, S3  | 495  | I          | F | N | R | F | D | C | F | V | V | C | S | G | I | L | E | I | L | L | V |
| CACNA1C   | Q13936          | Domain II, S3  | 587  | L          | F | N | R | F | D | C | F | V | V | C | G | G | I | L | E | T | I | L | V |
| CACNA1A   | O00555          | Domain II, S3  | 550  | S          | F | N | C | F | D | C | G | V | I | I | G | S | I | F | E | V | I | W | A |
| CACNA1E   | NP_000712       | Domain II, S3  | 539  | S          | F | N | C | F | D | F | G | V | T | V | G | S | I | F | E | V | V | W | A |
| CACNA1S   | Q13698          | Domain III, S3 | 867  | Y          | F | N | M | L | D | L | L | V | V | A | S | L | I | S | M | G | L | E | S |
| CACNA1C   | Q13936          | Domain III, S3 | 988  | Y          | F | N | I | L | D | L | L | V | V | S | V | S | L | I | S | F | G | I | Q |
| CACNA1G   | O43497          | Domain II, S3  | 806  | P          | Y | N | I | F | D | G | V | I | V | V | I | S | V | W | E | I | V | G | Q |
| CACNA1I   | Q9P0X4          | Domain II, S3  | 703  | P          | Y | N | I | F | D | S | I | I | V | I | I | S | I | W | E | I | V | G | Q |
| KvSHAL1   | AAH45659        | S3             | 264  | M          | S | L | I | D | V | V | A | I | L | P | Y | Y | I | G | L | V | P | K | N |
| KvSHAL3-2 | NP_751948       | S3             | 259  | M          | S | I | I | D | V | V | A | I | M | P | Y | Y | I | G | L | V | M | T | N |
| KvSHAL3-1 | NP_004971       | S3             | 259  | M          | S | I | I | D | V | V | A | I | M | P | Y | Y | I | G | L | V | M | T | N |
| KvSHAL2   | NP_036413       | S3             | 262  | M          | S | I | I | D | V | V | A | I | L | P | Y | Y | I | G | L | V | M | T | D |
| Kv1.2     | NP_000710.4     | S3             | 255  | I          | M | N | I | D | I | V | A | I | I | P | Y | F | I | T | L | G | T | E | L |
| Kv1.1     | NP_000208       | S3             | 254  | I          | M | N | F | I | D | I | V | A | I | I | P | Y | F | I | T | L | G | T | E |
| Kv1.3     | NP_002223       | S3             | 276  | I          | M | N | L | I | D | I | V | A | I | I | P | Y | F | I | T | L | G | T | E |
| Kv1.4     | NP_002224       | S3             | 404  | M          | N | I | I | D | I | V | S | I | L | P | Y | F | I | T | L | G | T | E | L |
| Kv1.5     | NP_002225       | S3             | 356  | M          | N | I | I | D | V | V | A | I | F | P | Y | F | I | T | L | G | T | E | L |
| Kv1.6     | NP_002226       | S3             | 296  | M          | N | I | I | D | L | V | A | I | F | P | Y | F | I | T | L | G | T | E | L |
| Kv1.7     | NP_114092       | S3             | 242  | M          | N | L | I | D | F | V | A | I | L | P | Y | F | V | A | L | G | T | E | L |
| Kv1.10    | NP_005540       | S3             | 304  | M          | N | I | I | D | I | I | S | I | I | P | Y | F | A | T | L | I | T | E | L |
| KvDRect   | NP_002243       | S3             | 255  | L          | N | I | I | D | F | V | S | I | I | P | F | Y | A | T | L | A | V | D | T |
| Kv3.4     | Q03721          | S3             | 314  | L          | N | I | I | D | F | V | A | I | L | P | F | Y | L | E | V | G | L | S | G |
| TRPM7     | Q96QT4          | S3             | 924  | F          | N | I | S | D | T | I | A | I | I | S | F | F | I | G | F | G | L | R | F |
| ADPKD2    | Q13563          | S3             | 506  | F          | W | N | C | L | D | V | V | I | V | V | L | S | V | V | A | I | G | I | N |
| PKD2L-1   | Q9P0L9          | S3             | 385  | I          | W | N | I | L | D | L | V | V | I | L | L | S | I | V | A | V | G | F | H |
| TRPM1     | NP_002411       | S3             | 833  | y          | W | N | I | T | D | L | V | A | I | S | T | F | M | I | G | A | I | L | R |
| TRPM2     | O94759          | S3             | 868  | W          | N | K | L | D | V | G | A | I | L | L | F | V | A | G | L | T | C | R | L |
| TRPM3     | NP_002411       | S3             | 965  | W          | N | V | T | D | L | I | A | I | L | L | F | S | V | G | M | I | L | R | L |
| TRPM4     | NP_060106       | S3             | 863  | W          | N | Q | C | D | L | V | A | L | T | C | F | L | L | G | V | G | C | R | L |
| TRPM5     | NP_055370       | S3             | 807  | W          | N | K | C | D | M | V | A | I | F | L | F | I | V | G | V | T | C | R | M |
| TRPM8     | Q7Z2W7          | S3             | 797  | W          | N | V | M | D | T | L | G | L | F | Y | F | I | A | G | I | V | F | R | L |
| TRPC4     | Q9UBN4          | S3             | 434  | W          | N | L | M | D | F | V | M | N | S | L | Y | L | A | T | I | S | L | K | I |
| TRPC6     | Q9UL62          | S3             | 435  | W          | N | L | M | D | F | A | M | N | S | L | Y | L | A | T | I | S | L | K | I |
| TRPC5     | Q9Y210          | S3             | 525  | W          | N | M | L | D | F | G | M | L | A | I | F | A | A | S | F | I | A | R | F |
| TRPC7     | Q9HCX4          | S3             | 471  | W          | N | L | D | F | G | M | L | S | I | F | V | A | S | F | T | A | R | F | F |
| CACNA1E   | NP_000712       | Domain IV, S3  | 1541 | T          | W | N | I | F | D | F | I | T | V | I | G | S | I | T | E | I | I | L | T |
| CACNA1G   | O43497          | Domain IV, S3  | 1674 | R          | W | N | Q | L | D | L | A | I | V | L | L | S | I | M | G | I | T | L | E |
| CACNA1I   | Q9P0X4          | Domain IV, S3  | 1557 | R          | W | N | Q | L | D | L | A | I | V | L | L | S | V | M | G | I | T | L | E |
| CACNA1G   | O43497          | Domain I, S3   | 151  | T          | W | N | R | L | D | F | F | I | V | I | A | G | M | L | E | Y | S | L | D |
| CACNA1I   | Q9P0X4          | Domain I, S3   | 149  | T          | W | N | R | L | D | F | F | I | V | M | A | G | M | V | E | Y | S | L | D |
| SCN7A     | Q01118          | Domain III, S3 | 999  | G          | W | Y | R | L | D | F | V | V | V | I | V | F | C | L | S | L | I | G | K |
| SCN10A    | Q9Y5Y9          | Domain II, S3  | 728  | K          | W | N | I | F | D | C | I | I | V | T | V | S | L | L | E | L | G | V | A |
| SCN5A     | Q14524          | Domain II, S3  | 780  | G          | W | N | I | F | D | S | I | I | V | I | L | S | L | M | E | L | G | L | S |
| SCN1A     | P35498          | Domain II, S3  | 831  | G          | W | N | I | F | D | G | F | I | V | T | L | S | L | V | E | L | G | L | A |
| SCN2A     | Q99250          | Domain II, S3  | 822  | G          | W | N | I | F | D | G | F | I | V | S | L | S | L | M | E | L | G | L | A |
| SCN3A     | Q9NY46          | Domain II, S3  | 823  | G          | W | N | I | F | D | G | I | I | V | S | L | S | L | M | E | L | G | L | S |
| SCN4A     | P35499          | Domain II, S3  | 641  | G          | W | N | I | F | D | S | I | I | V | T | L | S | L | V | E | L | G | L | A |
| SCN7A     | Q01118          | Domain II, S3  | 567  | G          | W | N | I | F | D | S | M | I | V | F | H | G | L | I | E | L | C | L | A |
| SCN8A     | Q9UQD0          | Domain II, S3  | 816  | G          | W | N | I | F | D | G | F | I | V | S | L | S | L | M | E | L | S | L |   |
| SCN9A     | Q15858          | Domain II, S3  | 807  | G          | W | N | I | F | D | S | L | I | V | T | L | S | L | V | E | L | F | L | A |
| SCN11A    | Q9UI33          | Domain II, S3  | 640  | G          | W | N | I | F | D | S | I | V | A | L | L | S | F | A | D | V | M | N | C |
| SCN1A     | P35498          | Domain IV, S3  | 1602 | G          | W | N | I | F | D | F | V | V | V | I | L | S | I | V | G | M | F | L |   |
| SCN2A     | Q99250          | Domain IV, S3  | 1592 | G          | W | N | I | F | D | F | V | V | V | I | L | S | I | V | G | M | F | L |   |
| SCN3A     | Q9NY46          | Domain IV, S3  | 1587 | G          | W | N | I | F | D | F | V | V | V | I | L | S | I | V | G | M | F | L |   |
| SCN4A     | P35499          | Domain IV, S3  | 1414 | G          | W | N | I | F | D | F | V | V | V | I | L | S | I | V | G | L | A | L |   |
| SCN8A     | Q9UQD0          | Domain IV, S3  | 1583 | G          | W | N | I | F | D | F | V | V | V | I | L | S | I | V | G | M | F | L |   |
| SCN9A     | Q15858          | Domain IV, S3  | 1576 | G          | W | N | I | F | D | F | V | V | V | I | L | S | I | V | G | M | F | L |   |
| SCN10A    | Q9Y5Y9          | Domain IV, S3  | 1537 | G          | W | N | V | F | D | F | I | V | V | V | L | S | I | A | S | L | I | F |   |

Table 3, continued

| Protein      | NCBI Identifier | Location              |             | S3 Segment |          |          |          |          |          |          |          |          |          |          |          |          |          |          |          |          |          |          |          |   |
|--------------|-----------------|-----------------------|-------------|------------|----------|----------|----------|----------|----------|----------|----------|----------|----------|----------|----------|----------|----------|----------|----------|----------|----------|----------|----------|---|
| SCN2A        | Q99250          | Domain I, S3          | 190         | P          | W        | N        | W        | L        | D        | F        | T        | V        | I        | T        | F        | A        | Y        | V        | T        | E        | F        | V        | D        |   |
| SCN3A        | Q9NY46          | Domain I, S3          | 189         | P          | W        | N        | W        | L        | D        | F        | S        | V        | I        | V        | M        | A        | Y        | V        | T        | E        | F        | V        | S        |   |
| SCN4A        | P35499          | Domain I, S3          | 191         | P          | W        | N        | W        | L        | D        | F        | S        | V        | I        | M        | M        | A        | Y        | L        | T        | E        | F        | V        | D        |   |
| SCN7A        | Q01118          | Domain I, S3          | 180         | P          | W        | N        | W        | L        | D        | F        | S        | V        | T        | V        | F        | E        | V        | I        | I        | R        | Y        | S        | P        |   |
| SCN8A        | Q9UQD0          | Domain I, S3          | 193         | P          | W        | N        | W        | L        | D        | F        | S        | V        | I        | M        | M        | A        | Y        | I        | T        | E        | F        | V        | N        |   |
| SCN9A        | Q15858          | Domain I, S3          | 187         | P          | W        | N        | W        | L        | D        | F        | V        | V        | I        | V        | F        | A        | Y        | L        | T        | E        | F        | V        | N        |   |
| SCN10A       | Q9Y5Y9          | Domain I, S3          | 188         | P          | W        | N        | W        | L        | D        | F        | S        | V        | I        | T        | L        | A        | Y        | V        | G        | T        | A        | I        | D        |   |
| SCN11A       | Q9UI33          | Domain I, S3          | 193         | P          | W        | N        | W        | L        | D        | S        | I        | V        | I        | G        | I        | A        | I        | V        | S        | Y        | I        | P        | G        |   |
| CACNA1S      | Q13698          | Domain I, S3          | 1181        | P          | W        | N        | V        | F        | D        | F        | L        | I        | V        | I        | G        | S        | I        | I        | D        | V        | I        | L        | S        |   |
| CACNA1C      | Q13936          | Domain IV, S3         | 1302        | P          | W        | N        | V        | F        | D        | F        | L        | I        | V        | I        | G        | S        | I        | I        | D        | V        | I        | L        | S        |   |
| TRPC3        | Q13507          | S3                    | 468         | L          | W        | N        | V        | L        | D        | F        | G        | M        | L        | S        | I        | F        | I        | A        | A        | F        | T        | A        | R        |   |
| CACNA1A      | O00555          | Domain III, S3        | 1312        | L          | W        | N        | I        | L        | D        | F        | I        | V        | V        | S        | G        | A        | L        | V        | A        | F        | A        | F        | T        |   |
| CACNA1E      | NP_000712       | Domain III, S3        | 1221        | L          | W        | N        | I        | L        | D        | F        | V        | V        | V        | V        | G        | A        | L        | V        | A        | F        | A        | L        | A        |   |
| CACNA1G      | O43497          | Domain III, S3        | 1345        | S          | W        | N        | V        | L        | D        | G        | L        | L        | V        | L        | I        | S        | V        | I        | D        | I        | L        | V        | S        |   |
| CACNA1I      | Q9P0X4          | Domain III, S3        | 1245        | S          | W        | N        | V        | L        | D        | G        | F        | L        | V        | F        | V        | S        | I        | I        | D        | I        | V        | V        | S        |   |
| <b>SCN5A</b> | <b>Q14524</b>   | <b>Domain IV, S3</b>  | <b>1590</b> | <b>S</b>   | <b>W</b> | <b>N</b> | <b>I</b> | <b>F</b> | <b>D</b> | <b>F</b> | <b>V</b> | <b>V</b> | <b>V</b> | <b>I</b> | <b>L</b> | <b>S</b> | <b>I</b> | <b>V</b> | <b>G</b> | <b>T</b> | <b>V</b> | <b>L</b> |          |   |
| CACNA1A      | O00555          | Domain IV, S3         | 1629        | A          | W        | N        | I        | F        | D        | F        | V        | T        | V        | L        | G        | S        | I        | T        | D        | I        | L        | V        | T        |   |
| SCN7A        | Q01118          | Domain IV, S3         | 1312        | A          | W        | N        | I        | F        | D        | F        | M        | V        | V        | I        | F        | S        | I        | T        | G        | L        | C        | L        |          |   |
| <b>SCN5A</b> | <b>Q14524</b>   | <b>Domain III, S3</b> | <b>1270</b> | <b>A</b>   | <b>W</b> | <b>C</b> | <b>W</b> | <b>L</b> | <b>D</b> | <b>F</b> | <b>L</b> | <b>I</b> | <b>V</b> | <b>D</b> | <b>V</b> | <b>S</b> | <b>L</b> | <b>V</b> | <b>S</b> | <b>L</b> | <b>V</b> | <b>A</b> | <b>N</b> |   |
| SCN1A        | P35498          | Domain III, S3        | 1283        | A          | W        | C        | W        | L        | D        | F        | L        | I        | V        | D        | V        | S        | L        | V        | S        | L        | T        | A        | N        |   |
| SCN2A        | Q99250          | Domain III, S3        | 1273        | A          | W        | C        | W        | L        | D        | F        | L        | I        | V        | D        | V        | S        | L        | V        | S        | L        | T        | A        | N        |   |
| SCN3A        | Q9NY46          | Domain III, S3        | 1271        | A          | W        | C        | W        | L        | D        | F        | L        | I        | V        | D        | V        | S        | L        | V        | S        | L        | V        | A        | N        |   |
| SCN4A        | P35499          | Domain III, S3        | 1096        | A          | W        | C        | W        | L        | D        | F        | L        | I        | V        | D        | V        | S        | I        | I        | S        | L        | V        | A        | N        |   |
| SCN8A        | Q9UQD0          | Domain III, S3        | 1263        | A          | W        | C        | W        | L        | D        | F        | L        | I        | V        | A        | V        | S        | L        | V        | S        | L        | I        | A        | N        |   |
| SCN9A        | Q15858          | Domain III, S3        | 1257        | A          | W        | C        | W        | L        | D        | F        | L        | I        | V        | D        | V        | S        | L        | V        | T        | L        | V        | A        | N        |   |
| SCN10A       | Q9Y5Y9          | Domain III, S3        | 1217        | A          | W        | C        | W        | L        | D        | F        | L        | I        | V        | N        | I        | S        | L        | I        | S        | L        | T        | A        | K        |   |
| SCN11A       | Q9UI33          | Domain III, S3        | 1121        | A          | W        | C        | C        | L        | D        | F        | I        | I        | V        | I        | V        | S        | V        | T        | T        | L        | I        | N        | L        |   |
| KHACN4       | Q9Y3Q4          | S3                    | 341         |            | W        | F        | M        | V        | D        | F        | I        | S        | S        | I        | P        | V        | D        | Y        | I        | F        | L        | I        | V        | E |
| BCNG1        | O60741          | S3                    | 220         |            | W        | F        | V        | V        | D        | F        | I        | S        | S        | I        | P        | V        | D        | Y        | I        | F        | L        | I        | V        | E |
| BCNG2        | Q9UL51          | S3                    | 289         |            | W        | F        | V        | V        | D        | F        | V        | S        | S        | I        | P        | V        | D        | Y        | I        | F        | L        | I        | V        | E |
| Kv10.1       | O95259          | S3                    | 295         |            | W        | F        | V        | I        | D        | L        | L        | S        | C        | L        | P        | Y        | D        | V        | I        | N        | A        | F        | E        | N |
| Kv10.2       | Q8NCM4          | S3                    | 292         |            | W        | F        | V        | I        | D        | L        | L        | S        | C        | L        | P        | Y        | D        | I        | I        | N        | A        | F        | E        | N |
| Kv11.1       | Q12809          | S3                    | 496         |            | W        | F        | L        | I        | D        | M        | V        | A        | A        | I        | P        | F        | D        | L        | L        | I        | F        | G        | S        | G |
| Kv11.2       | Q9H252          | S3                    | 345         |            | W        | F        | L        | I        | D        | M        | V        | A        | A        | I        | P        | F        | D        | L        | L        | I        | F        | R        | T        | G |
| KvH2C        | NP_742054       | S3                    | 157         |            | W        | F        | L        | I        | D        | M        | V        | A        | A        | I        | P        | F        | D        | L        | L        | I        | F        | G        | S        | G |
| KvG3-1       | AAH71558        | S3                    | 254         |            | L        | N        | I        | I        | D        | L        | L        | A        | I        | T        | P        | Y        | Y        | I        | S        | V        | L        | M        | T        | V |
| KvSHAL1      | AAH46629        | S3                    | 300         |            | L        | T        | L        | I        | D        | L        | V        | A        | I        | L        | P        | Y        | Y        | I        | T        | L        | L        | V        | D        | G |
| Kv7.1        | P51787          | S3                    | 197         |            |          | I        | S        | I        | D        | L        | I        | V        | V        | V        | A        | S        | M        | V        | V        | L        | C        | V        | G        | S |
| Kv7.4        | P56696          | S3                    | 173         |            | F        | C        | V        | I        | D        | F        | I        | V        | F        | V        | A        | S        | V        | A        | V        | I        | A        | A        | G        | T |
| TRPC1        | P48995          | S3                    | 458         |            | L        | S        | F        | V        | M        | N        | S        | L        | Y        | L        | A        | T        | F        | A        | L        | K        | V        | V        | A        | H |
| TRPM6        | Q9BX84          | S3                    | 910         |            | W        | N        | L        | T        | E        | T        | V        | A        | I        | G        | L        | F        | S        | A        | G        | F        | V        | L        | R        | W |
| PKD2L-2      | Q9NZM6          | S3                    | 315         |            | I        | W        | N        | W        | L        | E        | L        | L        | L        | L        | L        | C        | F        | V        | A        | V        | S        | F        | N        |   |

\*BLAST alignments of S3 transmembrane segments among homologous proteins demonstrate sequence conservation of positions D1275, V1279, and D1595 in *SCN5A*. Relevant residues and segments of human *SCN5A* are in boldface and bracketed for

easier identification. Colors were randomly selected and assigned to different amino acids to facilitate alignment.
